# Supplementary material for: Co-sensitized DSCs: dye selection criteria for optimized device Vocand efficiency
Source: Royal Society of Chemistry journal article supplement (doi:10.1039/c0jm03661g), 2010-12-22
Supplement: c0jm03661g.pdf [file c0jm03661g.pdf]

SUPPLEMENTARY INFORMATION

## Co-Sensitized DSC: Dye selection criteria for device $V_{oc}$ and Efficiency

John N. Clifford,<sup>a</sup> Amparo Forneli,<sup>a</sup> Huajie Chen,<sup>b</sup> Tomas Torres,<sup>c</sup> Songting Tan<sup>b</sup> and Emilio Palomares<sup>a, d, \*</sup>

<sup>a</sup> *Institute of Chemical Research of Catalonia (ICIQ), Av. Països Catalans, 16, Tarragona 43007, Spain. Fax: +34 977 920 224; Tel: +34 977 920 241; E-mail: epalomares@iciq.es*

<sup>b</sup> *College of Chemistry, Xiangting University, Xiangting 411105, China. E-mail: tanst2008@163.com*

<sup>c</sup> *Departamento de Química, Orgánica, E-28049, Universidad Autónoma de Madrid (UAM), Madrid E-28049, Spain. Fax: +34 914 973 966; Tel: +34 914 974 151; E-mail: tomas.torres@uam.es*

<sup>d</sup> *ICREA, Passeig Lluís Companys 28, E-08012, Barcelona, Spain.*

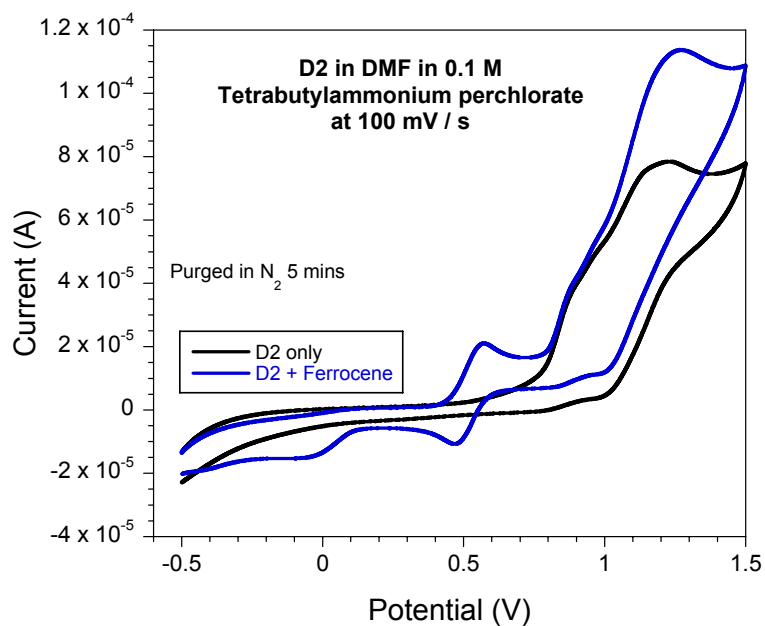

**Fig. S1.** Cyclic voltammetry of **D2**. The reference used was the  $\text{AgNO}_3$  (0.011M) /  $\text{LiClO}_4$  (0.1M) electrode (therefore add 0.3 V to convert to NHE). We observe irreversible oxidation in the above CV and 1V is taken for the onset of oxidation processes.

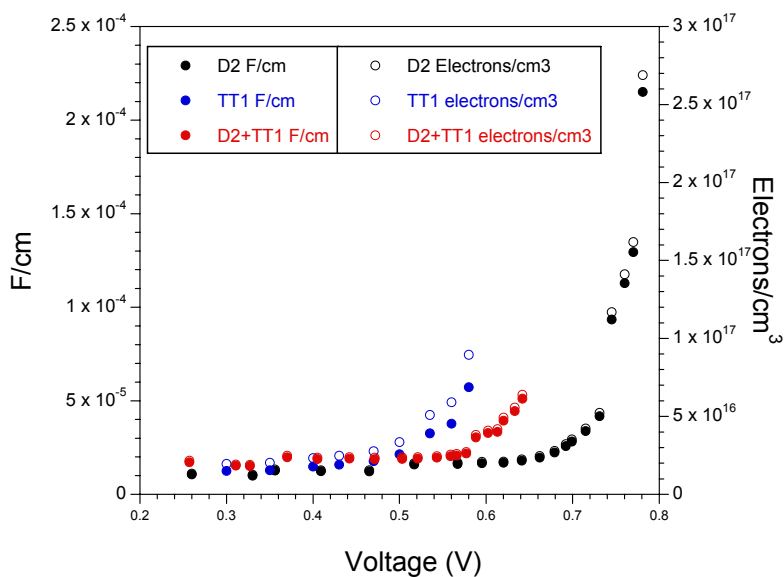

**Fig. S2.** Charge extraction data of **D2**, **TT1** and **D2+TT1** DSC devices. Charge is expressed both in capacitance (F/cm) and in electrons per  $\text{cm}^3$ .
